# Supplementary material
Source: HighWire-hosted journal article supplement (https://bmjopen.bmj.com/content/12/4/e059960)
Supplement: inline-supplementary-material-1 [file inline-supplementary-material-1.pdf]

## Deltagerinformation og samtykkeerklæring ved deltagelse i et videnskabeligt projekt

Effekten af åben dialog om komplementær og alternativ behandling integreret i kræftbehandlingen. Patientoplevelt livskvalitet og velvære

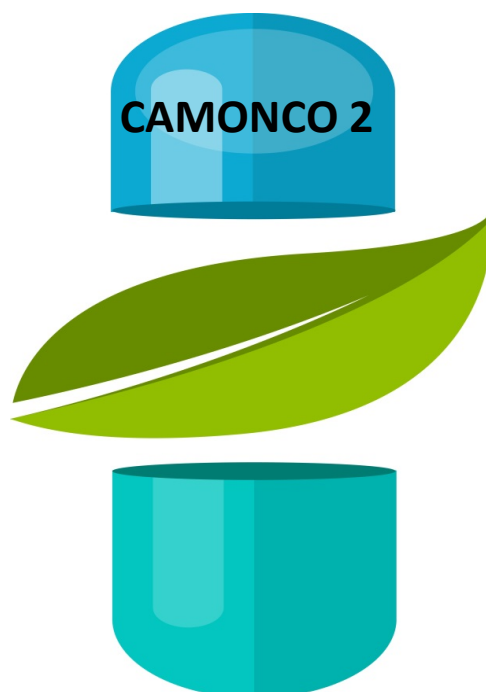

Engelsk titel:

The efficacy of open dialogue about complementary alternative medicine integrated in conventional oncology care. Patient reported quality of life and well-being

Version 1  
2. marts 2020

## Deltagerinformation

Vi ønsker at fremme åben dialog mellem patienter og sundhedsprofessionelle om komplementær og alternativ behandling, når patienter har et behandlingsforløb i Onkologisk Afdeling. Det alternative kan f.eks. bestå af kosttilskud, akupunktur, massage mm. De, der bedst kan hjælpe os, er patienter som dig, der er i kræftbehandling. Derfor vil vi spørge, om du vil deltage i et videnskabeligt forsøg, der udføres på Onkologisk Afdeling.

Før du beslutter, om du vil deltage i forsøget, skal du fuldt ud forstå, hvad det går ud på. Vi vil derfor bede dig om at læse denne deltagerinformation igennem. Ved din næste samtale eller behandling i Onkologisk Ambulatorium vil forsøget blive uddybet og du kan stille spørgsmål. Du er velkommen til at tage et familiemedlem, en ven eller en bekendt med til samtalen. Herefter har du ret til betænkningstid på mindst et døgn.

Sammen med denne deltagerinformation har du også fået udleveret folderen "Før du beslutter dig", som vi opfordrer dig til at læse. Her kan du få yderligere oplysninger om deltagelse i forsøg.

Det er frivilligt at deltage og du kan når som helst og uden grund trække dit samtykke tilbage. Det vil på ingen måde få indflydelse på din videre behandling.

Hvis du beslutter dig for at deltage i forsøget, vil vi bede dig om at underskrive samtykkeerklæringen vedhæftet denne information. Hvis du ikke ønsker at deltage, håber vi, du vil udfylde sidste side.

## Baggrund for projektet

Mange patienter med kræft anvender såkaldt komplementær og alternativ behandling (KAB) som et supplement til kemoterapi eller immunterapi. I nogle tilfælde er disse behandlinger ikke forenelige, hvilket kan betyde, at man enten ikke får gavn af kemoterapien og immunterapien eller, at man får unødige bivirkninger. På den anden side kan visse former for KAB øge livskvaliteten og velværet hos patienter med kræft. Derfor er det vigtigt, at patienter og sundhedsprofessionelle taler åbent med hinanden om både fordele og ulemper ved KAB som et supplement til kemoterapi eller immunterapi.

Baseret på vores tidligere, lignende projekt tyder det på, at åben dialog om KAB kan forbedre patientens livskvalitet og velvære. Denne undersøgelse skal derfor vise, om samtaler om KAB som en integreret del af kræftbehandlingen kan forbedre patientens livskvalitet og velvære og bidrage til, at patienten er tilfreds med sit valg om at modtage kræftbehandling.

## Hvad går projektet ud på?

Vi inviterer 207 patienter til at deltage i undersøgelsen. Halvdelen tilbydes en samtale om KAB med en specialuddannet sygeplejerske. De patienter, der ikke tilbydes samtale om komplementær og alternativ behandling, følger Onkologisk Afdelings vanlige forløb, der består af samtaler om kemoterapi og/eller immunterapi samt henvisning til en hjemmeside om komplementær og alternativ behandling ([www.KABcancer.dk](http://www.KABcancer.dk)). Udvælgelsen foregår ved computerbaseret lodtrækning.

Få dage efter underskrivelse af samtykkeerklæringen får man besked på, om man er blevet tildelt en samtale om KAB.

Samtalen foregår i starten af behandlingsforløbet i Onkologisk Afdeling og varer 1 time. Den tager udgangspunkt i patientens værdier, ønsker og præferencer med hensyn til KAB og indeholder råd og vejledning i forhold hertil. Hvis der er behov for det, tilbydes en opfølgende samtale.

For at kunne undersøge effekten af disse samtaler vil vi bede dig om at udfylde et spørgeskema 4 gange i løbet af behandlingsforløbet. Det første skema modtager du på papir i forbindelse med tilmeldingen til forsøget. De næste får du i eBoks 8, 12 og 24 uger senere til udfyldelse elektronisk.

### Hvad betyder forsøget for dig selv eller andre?

Hvis du bliver udvalgt til at deltage i en samtale om KAB, er det muligt, at du vil drage nytte deraf. Resultaterne af forsøget forventes dog primært at være nyttige i forhold til fremtidige patienter med kræft.

### Eventuelle bivirkninger, risici eller ulemper

Du udsættes ikke for øget risiko eller ubehag. Det kan føles som en ulempe ved forsøget, at du skal bruge tid på at besvare spørgeskemaer og at du muligvis vil skulle møde en ekstra gang i Onkologisk Ambulatorium.

### Hvem kan få oplysninger?

Alle oplysninger om dig i dette projekt opbevares fortroligt i henhold til dansk lovgivning (databeskyttelsesloven og databeskyttelsesforordningen). Personale, der er involveret i projektet, vil få adgang til oplysningerne i indtil 5 år efter forsøgets afslutning. Tavshedspligt er gældende for alt personale, og din identitet bliver ikke afsløret, når vi offentliggør resultaterne af projektet. Vi registrerer en række oplysninger om din sygdom fra din elektroniske patientjournal, men kun de oplysninger, der er nødvendige for at opgøre forsøgsresultaterne.

Projektet gennemføres i et samarbejde mellem Onkologisk Afdeling, Vejle Sygehus og Syddansk Universitet. Resultaterne af undersøgelsen forventes at kunne gøres op i år 2021 og vil i anonymiseret form blive søgt offentliggjort i et internationalt, videnskabeligt tidsskrift og være tilgængelige på [www.ClinicalTrials.gov](http://www.ClinicalTrials.gov). Du er også velkommen til at kontakte undertegnede til den tid for at få et uddrag af resultaterne.

## Godkendelse og økonomi

Patient- og Pårørenderådet ved Vejle Sygehus har taget initiativ til undersøgelsen, som er godkendt af Region Syddanmark. Studiet finansieres delvist af Fondation Idella. Øvrige fonde vil blive søgt om midler til aflønning af projektsygeplejerske og statistiker.

Vi håber, at du med denne information har fået tilstrækkeligt indblik i, hvad det vil sige at deltage i forsøget, og at du føler dig rustet til at tage beslutning om din eventuelle deltagelse.

Med venlig hilsen

Lars Henrik Jensen  
Klinisk lektor, overlæge, PhD  
Onkologisk Afdeling  
Vejle Sygehus

Mette Stie  
Klinisk Sygeplejespecialist, cand.cur., PhD-studerende  
E-mail: mette.stie@rsyd.dk  
Tlf.: 7940 6060

## Patientens kopi

**Samtykkeerklæring****Effekten af åben dialog om komplementær og alternativ behandling integreret i kræftbehandlingen. Patientoplevelt livskvalitet og velvære. CAMONCO 2**

(The efficacy of open dialogue about complementary alternative medicine integrated in conventional oncology care. Patient reported quality of life and well-being, CAMONCO 2)

**Erklæring fra forsøgspartageren**

Jeg har fået skriftlig og mundtlig information og jeg ved nok om formål, metode, fordele og ulemper til at sige ja til at deltage.

Jeg ved, at det er frivilligt at deltage, og at jeg altid kan trække mit samtykke tilbage uden at miste mine nuværende eller fremtidige rettigheder til behandling.

Jeg giver samtykke til at deltage i forskningsprojektet og til at forskningsgruppen må hente oplysninger i min journal om mit behandlingsforløb i Onkologisk Afdeling til brug i projektet.

Jeg har fået en kopi af dette samtykkeark samt en kopi af den skriftlige information om projektet til eget brug.

Patient navn:

\_\_\_\_\_

BLOKBOGSTAVER

Jeg ønsker at besvare spørgeskemaer elektronisk (sæt X)

\_\_\_JA

\_\_\_NEJ

Mailadresse \_\_\_\_\_

Dato og patientunderskrift:

\_\_\_\_\_

Dato

\_\_\_\_\_

Underskrift

**Erklæring fra den informerende sygeplejerske/læge**

Jeg erklærer, at forsøgspartageren har modtaget mundtlig og skriftlig information om forsøget og har haft mulighed for at stille spørgsmål til mig. Efter min overbevisning er der givet tilstrækkelig information til, at der kan træffes beslutning om deltagelse i forsøget.

Informerende sygeplejerske/læge:

\_\_\_\_\_

BLOKBOGSTAVER

Dato og underskrift, informerende sygeplejerske/læge:

\_\_\_\_\_

Dato

\_\_\_\_\_

Underskrift

## Sygeplejerskens/lægens kopi

**Samtykkeerklæring****Effekten af åben dialog om komplementær og alternativ behandling integreret i kræftbehandlingen. Patientoplevelt livskvalitet og velvære, CAMONCO 2**

(The efficacy of open dialogue about complementary alternative medicine integrated in conventional oncology care. Patient reported quality of life and well-being, CAMONCO 2)

**Erklæring fra forsøgsdeltageren**

Jeg har fået skriftlig og mundtlig information og jeg ved nok om formål, metode, fordele og ulemper til at sige ja til at deltage.

Jeg ved, at det er frivilligt at deltage, og at jeg altid kan trække mit samtykke tilbage uden at miste mine nuværende eller fremtidige rettigheder til behandling.

Jeg giver samtykke til at deltage i forskningsprojektet og til at forskningsgruppen må hente oplysninger i min journal om mit behandlingsforløb i Onkologisk Afdeling til brug i projektet.

Jeg har fået en kopi af dette samtykkeark samt en kopi af den skriftlige information om projektet til eget brug.

Patient navn: \_\_\_\_\_

BLOKBOGSTAVER

Jeg ønsker at besvare spørgeskemaer elektronisk (sæt X)      \_\_\_JA      \_\_\_NEJ

Mailadresse \_\_\_\_\_

Dato og patientunderskrift: \_\_\_\_\_

Dato      Underskrift

**Erklæring fra den informerende sygeplejerske/læge**

Jeg erklærer, at forsøgsdeltageren har modtaget mundtlig og skriftlig information om forsøget og har haft mulighed for at stille spørgsmål til mig. Efter min overbevisning er der givet tilstrækkelig information til, at der kan træffes beslutning om deltagelse i forsøget.

Informerende sygeplejerske/læge: \_\_\_\_\_

BLOKBOGSTAVER

Dato og underskrift, informerende sygeplejerske/læge: \_\_\_\_\_

Dato      Underskrift

Udfyldes af Forskningsenheden

Patientnummer         Patient-initialer

Deltagerinformation version 1, 02.03.2020, CAMONCO 2

Videnskabsetisk Komité nr. S-20202000-5

Side 6 af 7

**Jeg ønsker ikke at deltage**

Tak fordi du tog dig tid til at blive informeret og forholde dig til projektet. Din beslutning om ikke at deltage, får på ingen måde indflydelse på din videre behandling og pleje.

Vi vil dog sætte pris på at få dine svar på nedenstående få spørgsmål.

- 1) Hvad er dit køn? (sæt x)  Mand  Kvinde
- 2) Hvad er din fødselsdato og år? \_\_\_\_\_
- 3) Hvilken type kræft er du i behandling for (sæt X)
  - Brystkræft
  - Prostatakræft
  - Lungekræft
  - Tarmkræft
  - Æggestokkræft
  - Livmoderkræft
  - Bugspytkirtelkræft
- 4) Hvad er målet med behandlingen? (sæt x)  Helbredelse  Lindring

Mange tak for din besvarelse.
